# Supplementary material for: RETRACTED ARTICLE: Tobacco-smoking-related prevalence of methanogens in the oral fluid microbiota
Source: PubMed Central journal article supplement (PMC6003954; doi:10.1038/s41598-018-27372-7), 2018-06-15
Supplement: 41598_2018_27372_MOESM1_ESM.pdf [file 41598_2018_27372_MOESM1_ESM.pdf]

## **Tobacco-smoking-related prevalence of methanogens in the oral fluid microbiota**

Ghiles Grine<sup>1</sup>, Elodie Terror<sup>1,2</sup>, Mahmoud Abdelwadoud Boualam<sup>1</sup>, Gérard Aboudharam<sup>1,2</sup>,

Hervé Chaudet<sup>1</sup>, Raymond Ruimy<sup>3</sup>, Michel Drancourt<sup>1\*</sup>

### **SUPPLEMENTARY MATERIAL:**

**Supplementary text:** English translation of the anonymized questionnaire filled by all the participants to this study.

## Patient questionnaire

### **PATIENT INFORMATION**

#### **General data**

Last name and first name:

Birth date:

Sex:

Age:

Profession:

Medical background:

Followed treatments:

Dental status:

#### **Periodontal data**

|                                  | <b>NO</b>                | <b>Yes</b>               |
|----------------------------------|--------------------------|--------------------------|
| Previous periodontal treatment:  | <input type="checkbox"/> | <input type="checkbox"/> |
| Presence of inflammation:        | <input type="checkbox"/> | <input type="checkbox"/> |
| Presence of dental plaque:       | <input type="checkbox"/> | <input type="checkbox"/> |
| Presence of tartar:              | <input type="checkbox"/> | <input type="checkbox"/> |
| Presence of recession:           | <input type="checkbox"/> | <input type="checkbox"/> |
| Presence of mobility:            | <input type="checkbox"/> | <input type="checkbox"/> |
| Presence of periodontal abscess: | <input type="checkbox"/> | <input type="checkbox"/> |
| Loss of attachment:              | <input type="checkbox"/> | <input type="checkbox"/> |
| Presence of implants:            | <input type="checkbox"/> | <input type="checkbox"/> |
